# Supplementary material for: Mercury in Macrolepiota procera (Scop.) Singer and Its Underlying Substrate—Environmental and Health Risks Assessment
Source: MDPI journal article supplement (doi:10.3390/jof7090772), 2021-09-18
Supplement: s1 [file s1]

## Supplementary Material

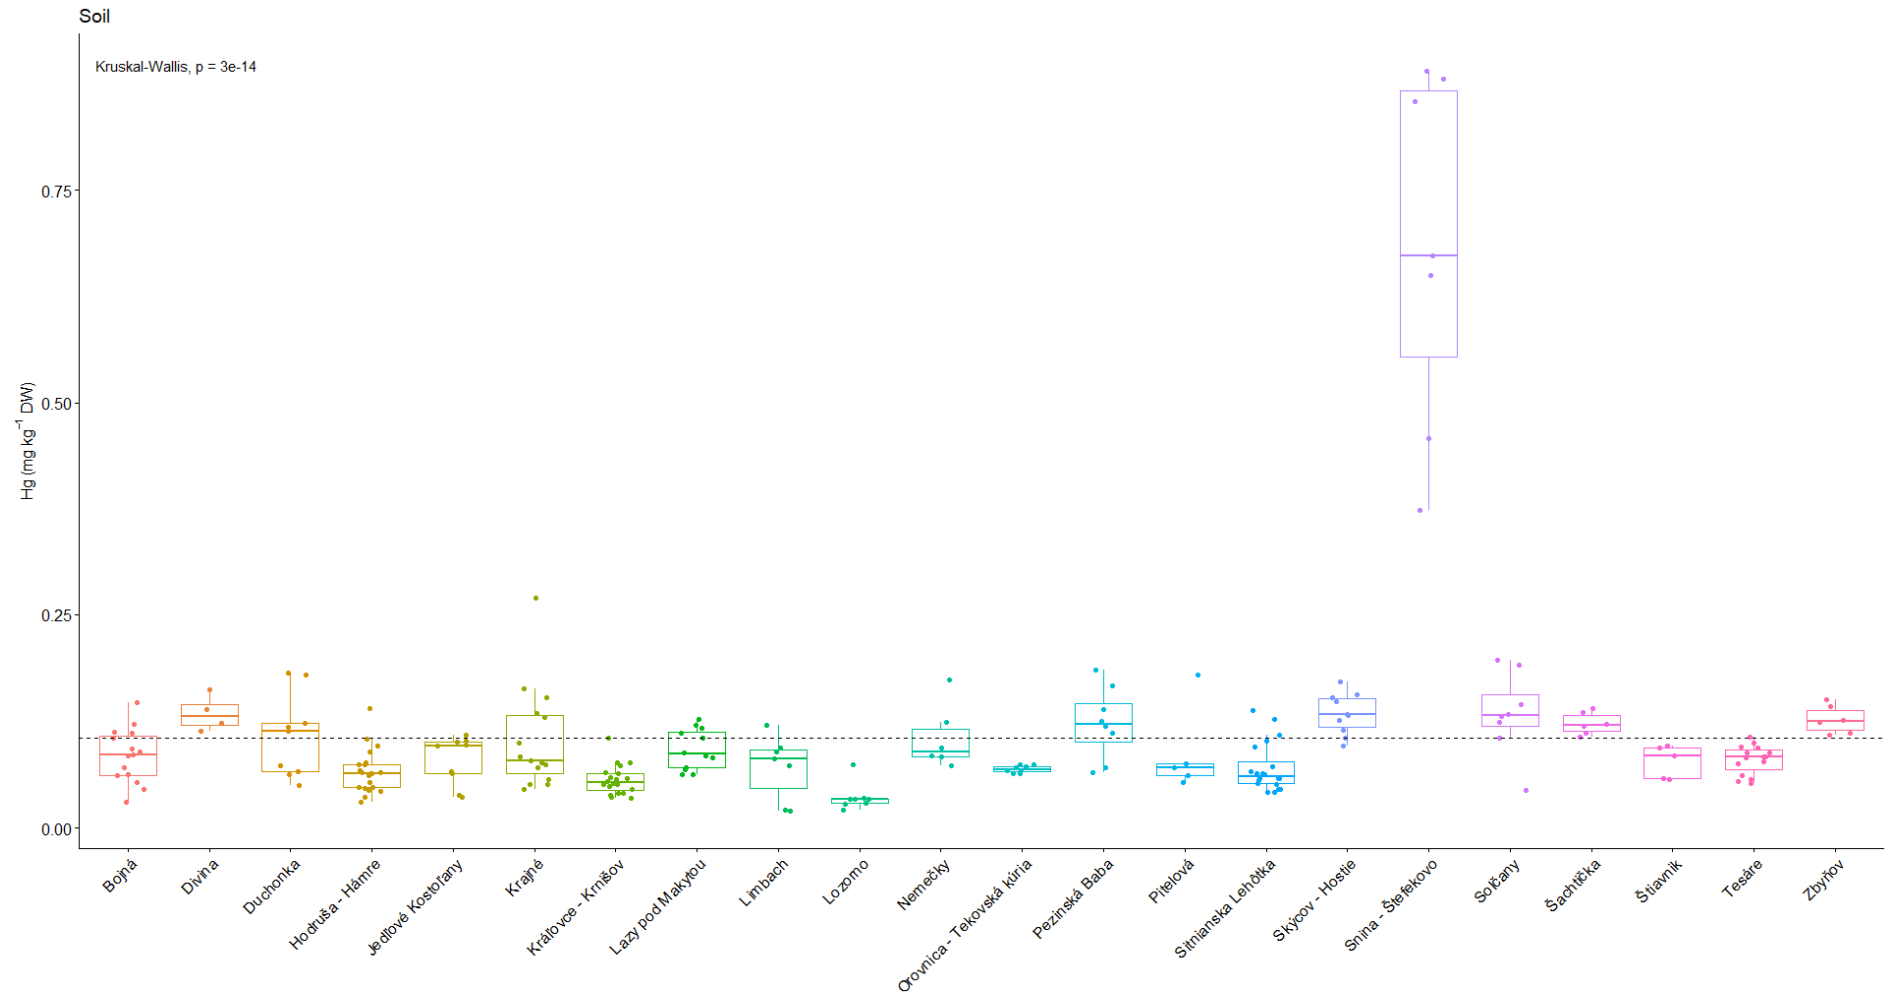

**Figure S1.** Mercury concentrations in soils/substrates, concerning localities. The horizontal line presents the average concentration for all samples.

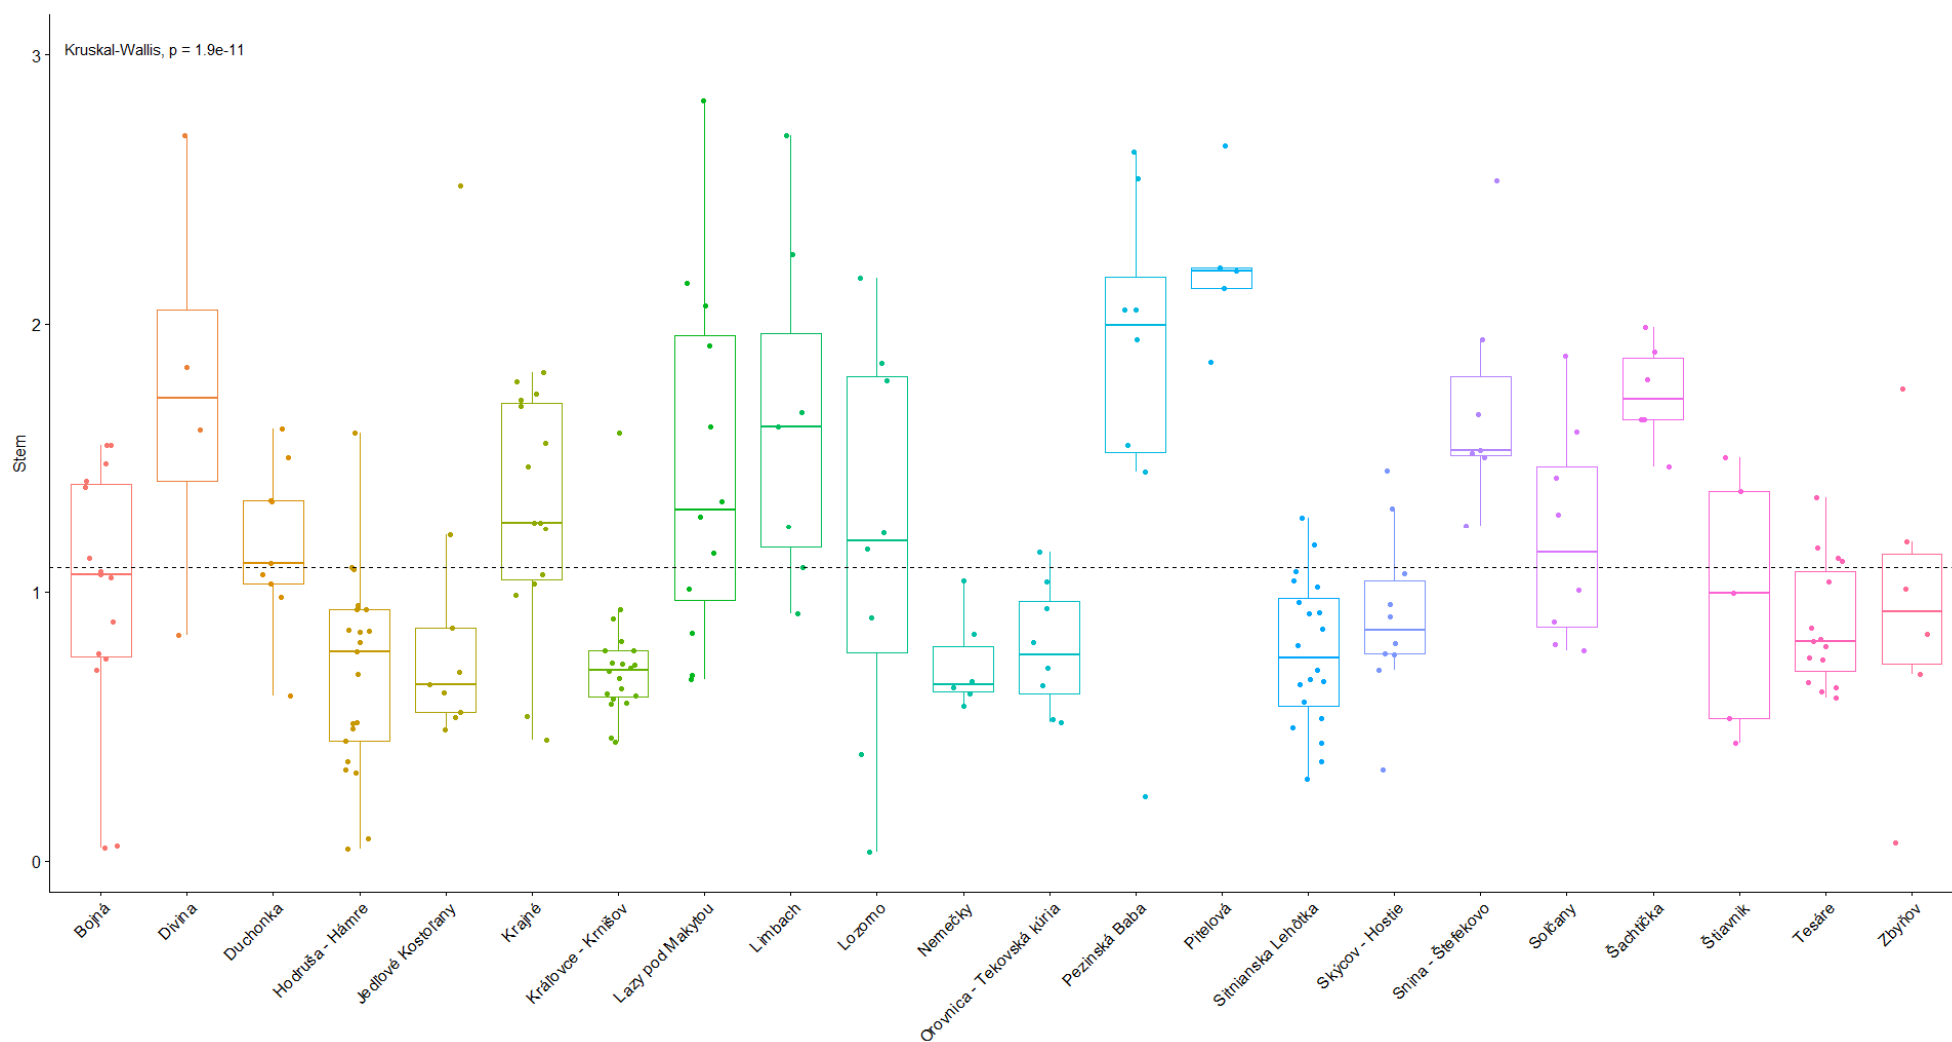

**Figure S2.** Mercury concentrations in mushroom stems, concerning localities. The horizontal line presents the average concentration for all samples.

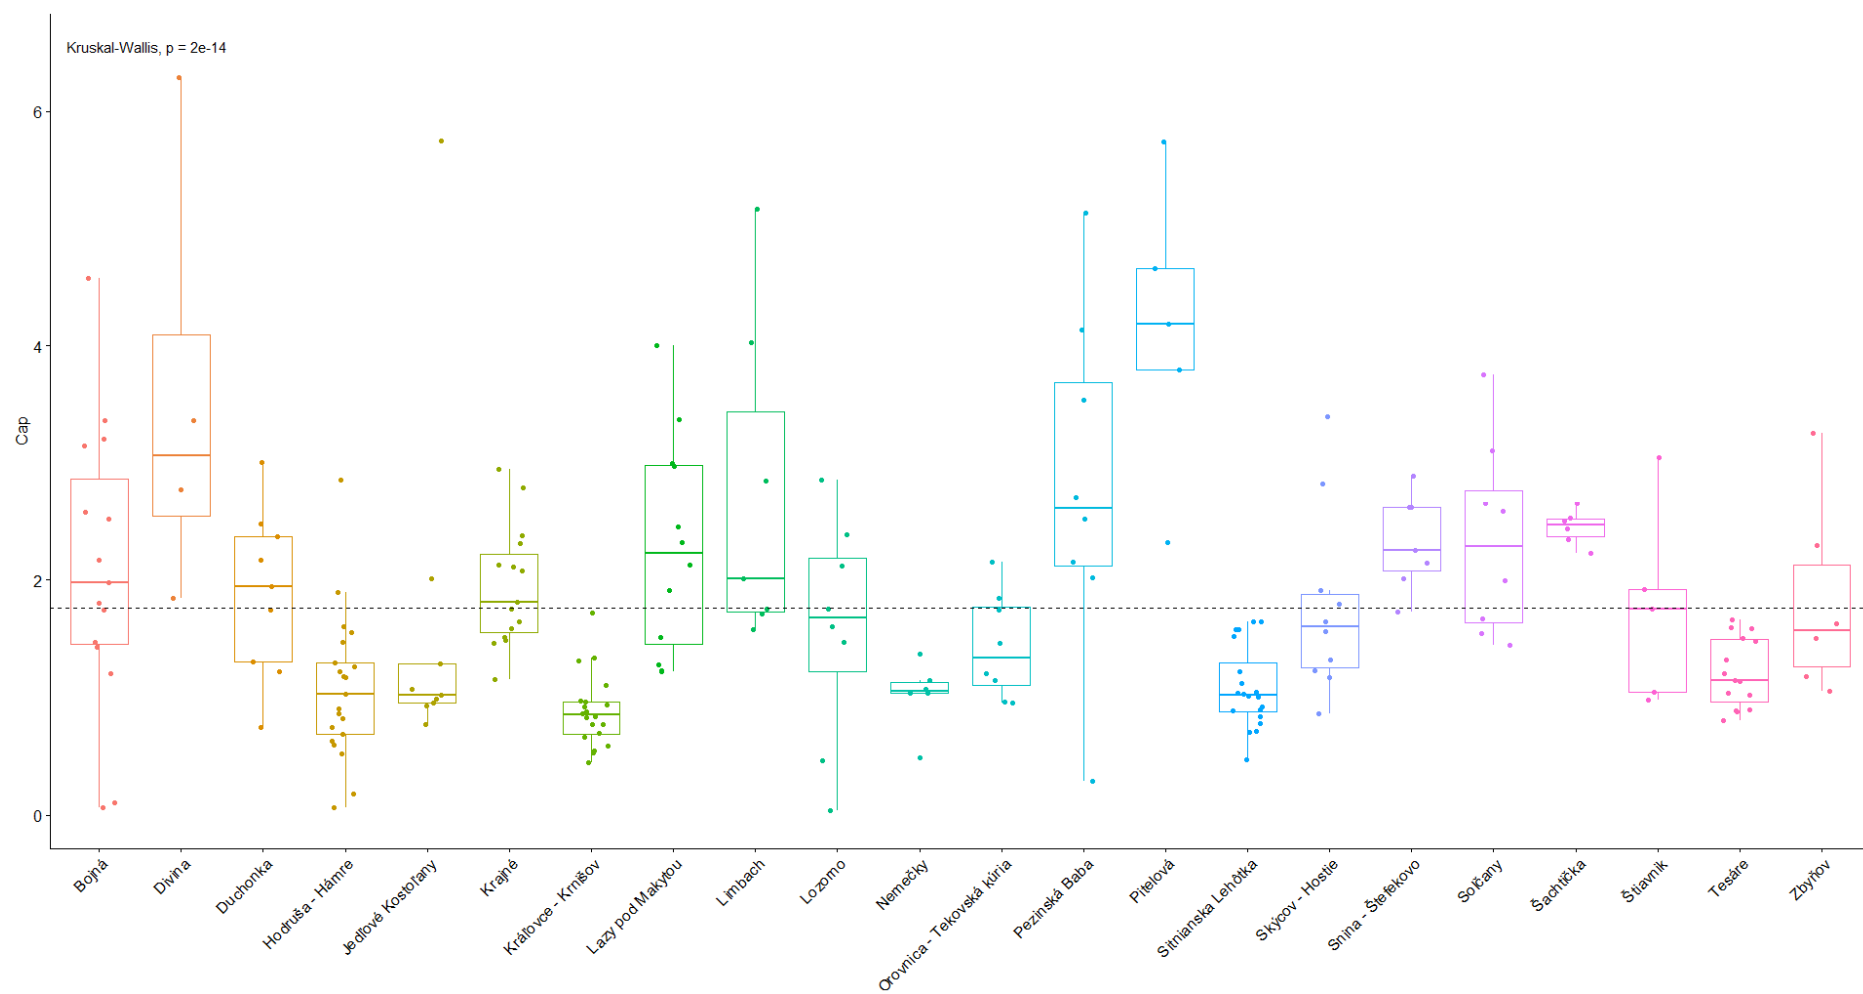

**Figure S3.** Mercury concentrations in mushroom caps, concerning localities. The horizontal line presents the average concentration for all samples.

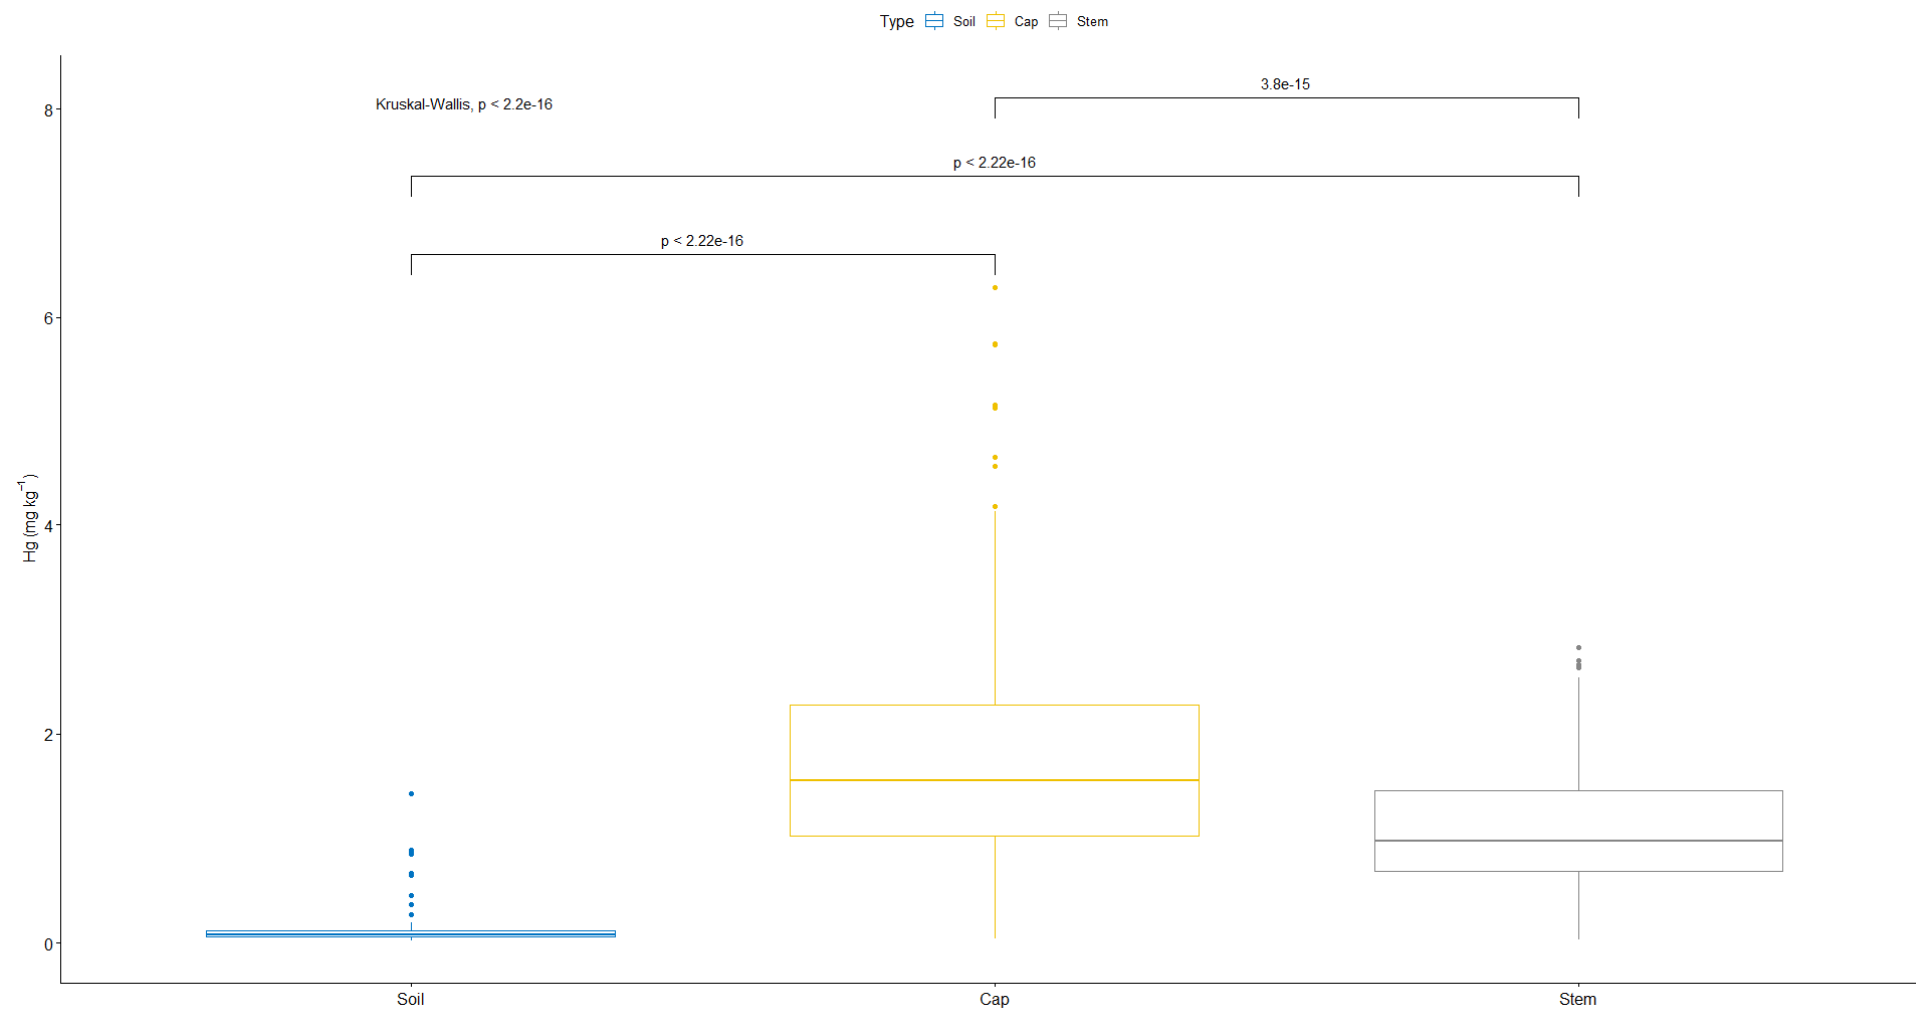

**Figure S4.** Mercury concentrations in soils/substrates and mushroom body parts (caps and stems).
